# Supplementary material
Source: PubMed Central journal article supplement (PMC5392371)

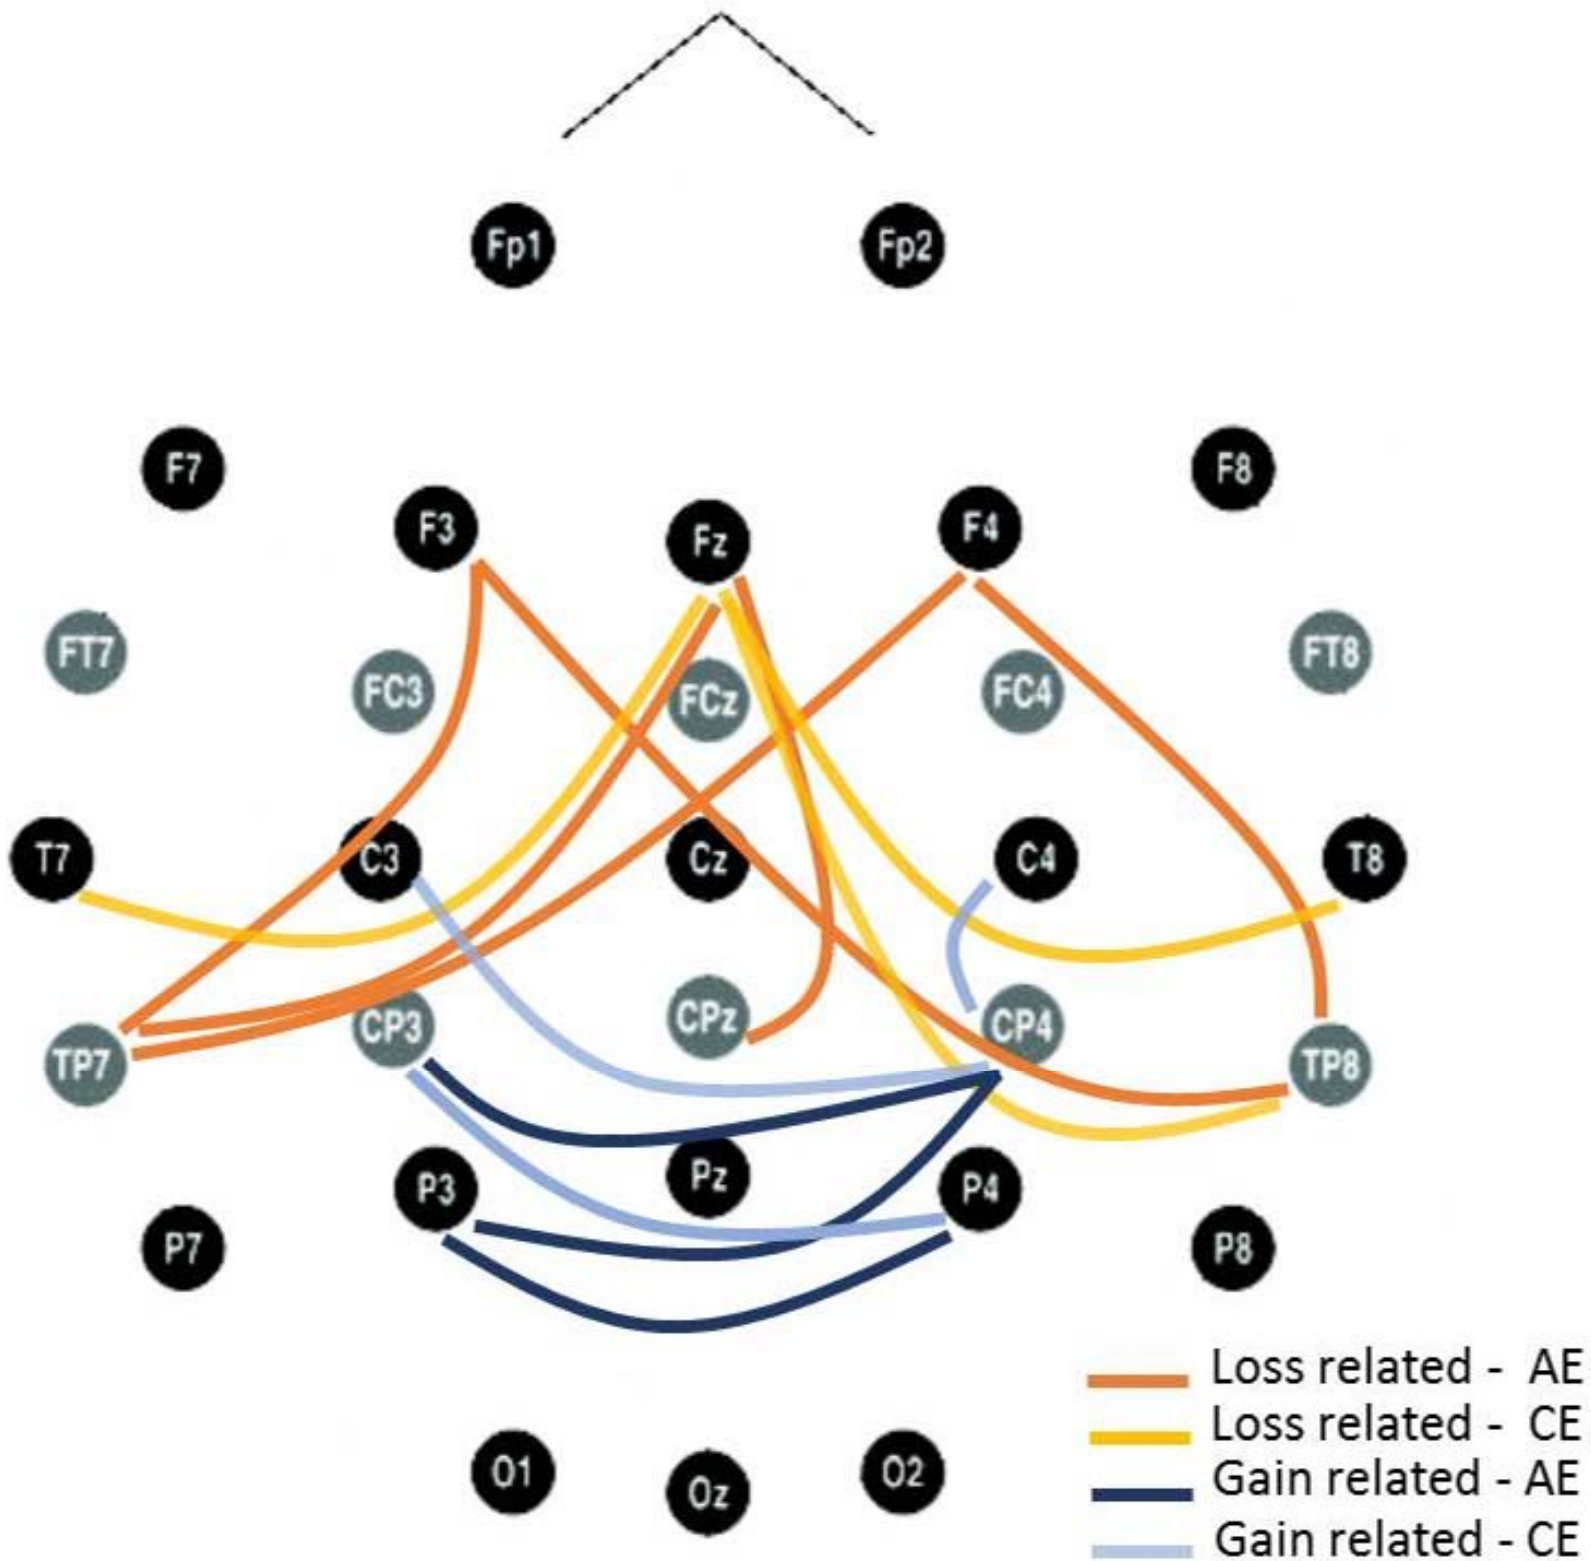

Supplement: NIHMS842909-supplement-1.pdf [file NIHMS842909-supplement-1.pdf]

A)

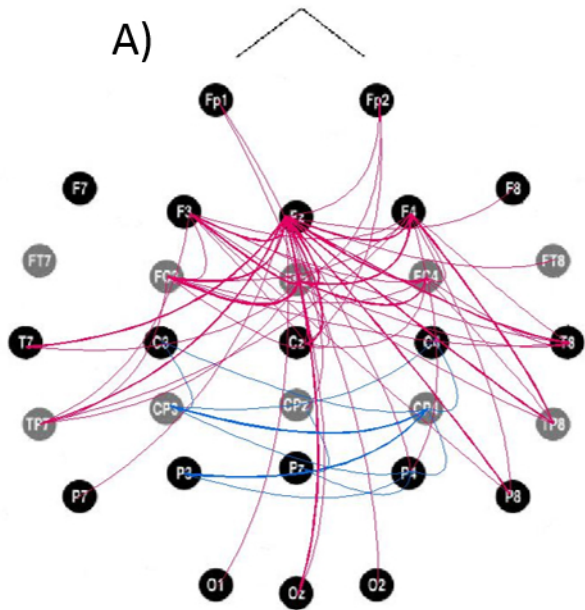

B)

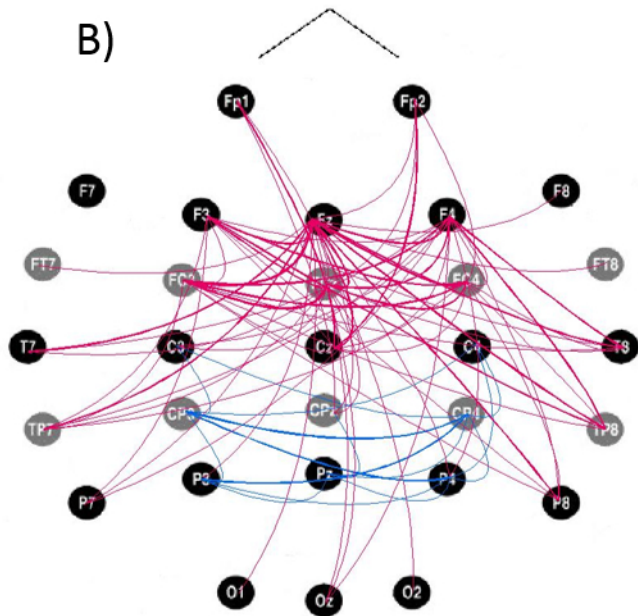

Supplement: NIHMS842909-supplement-2.pdf [file NIHMS842909-supplement-2.pdf]

# The Gambling Task (2 sample trials are shown)

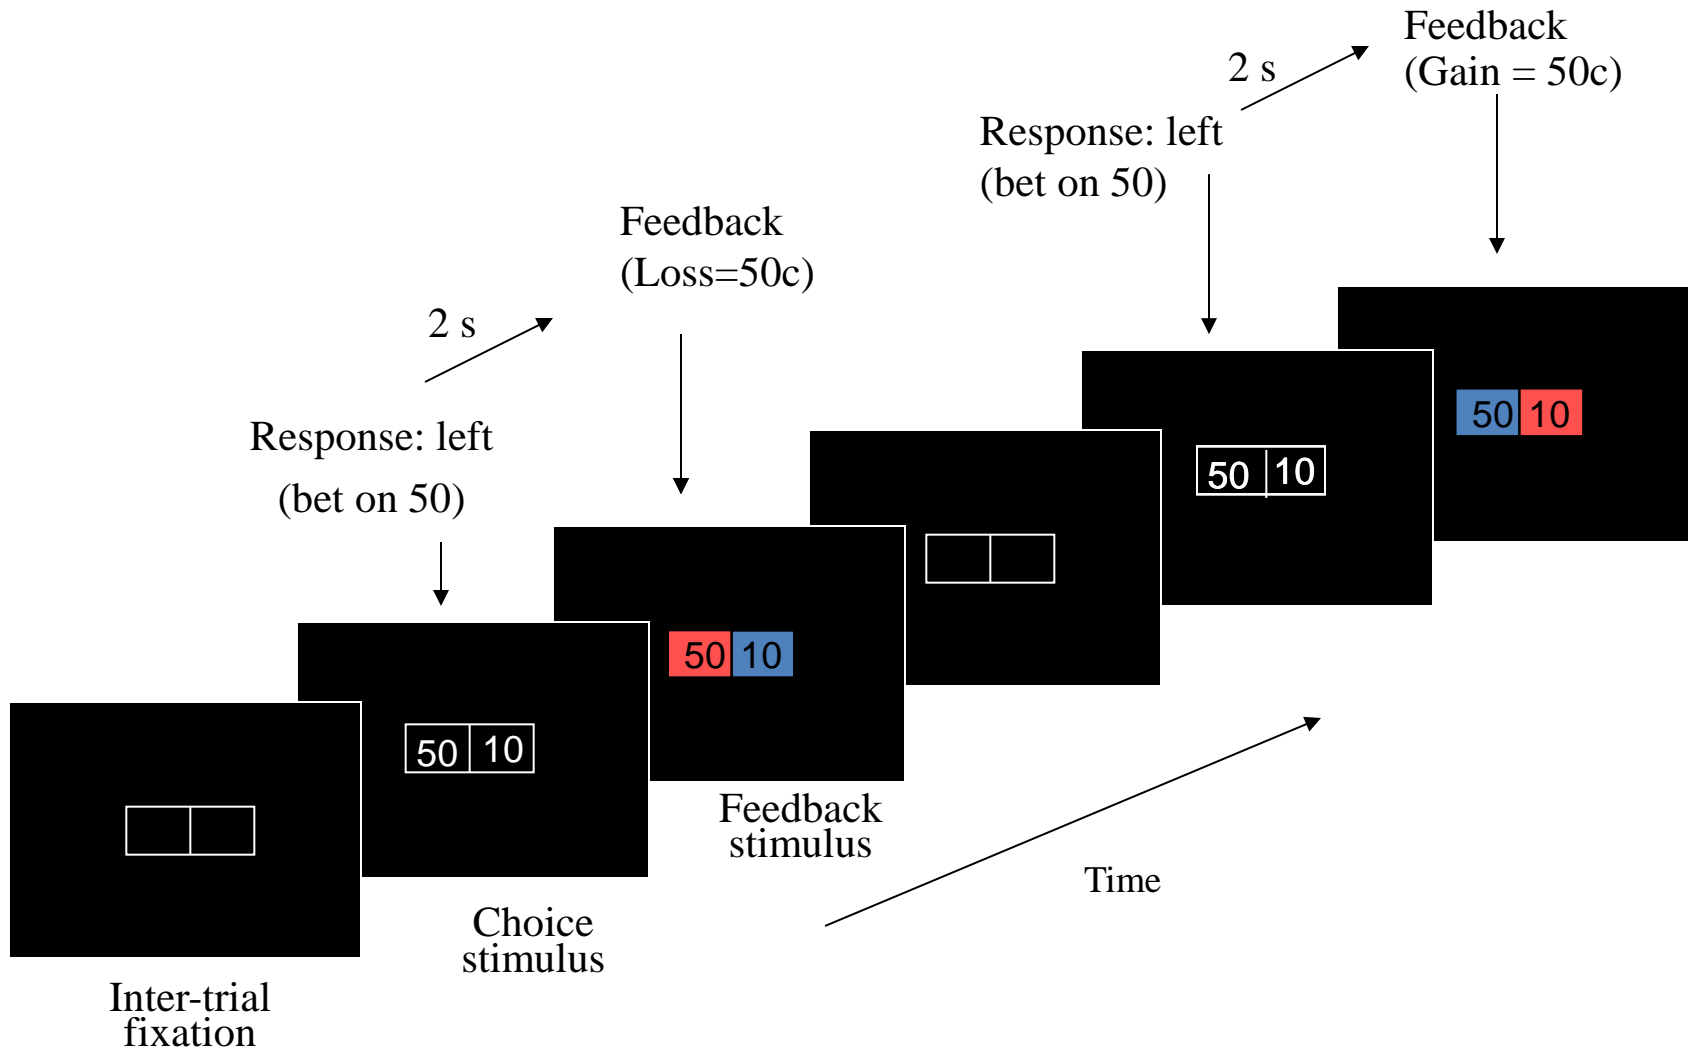

Supplement: NIHMS842909-supplement-5.pdf [file NIHMS842909-supplement-5.pdf]

MZ

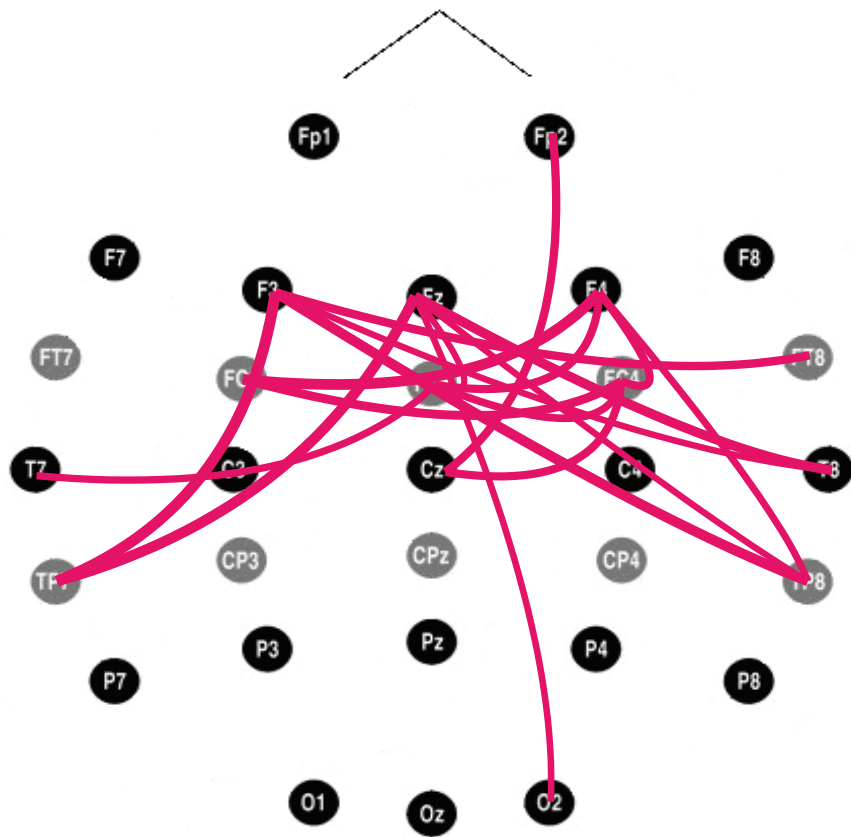

DZ

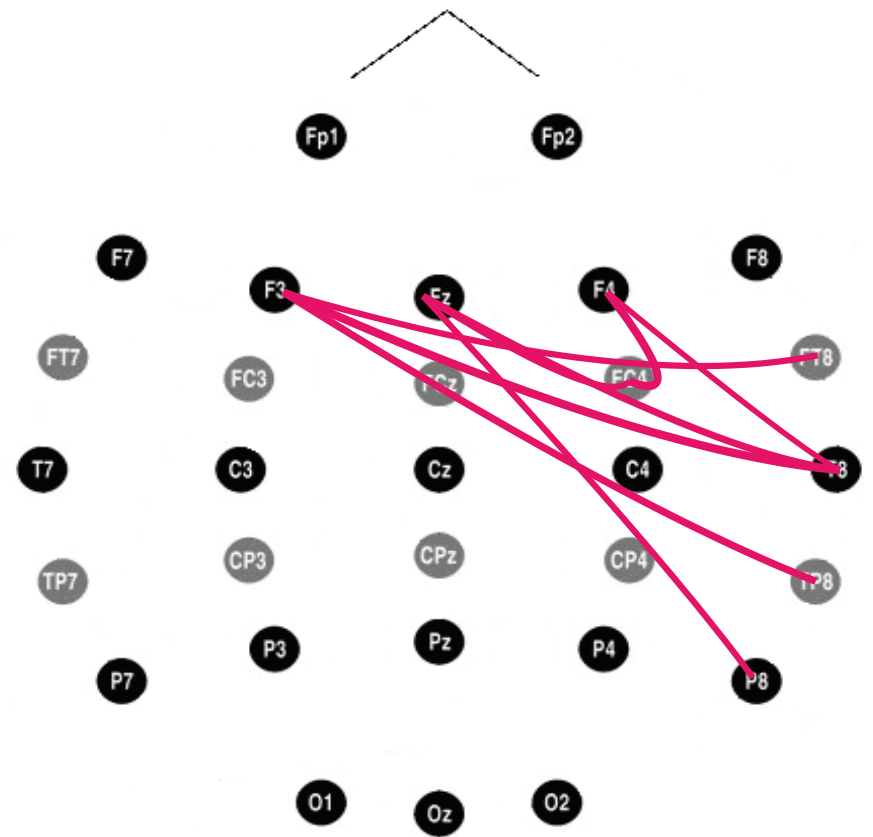

$p < .01$

Supplement: NIHMS842909-supplement-6.pdf [file NIHMS842909-supplement-6.pdf]
